# Supplementary material
Source: HighWire-hosted journal article supplement (http://www.cmajopen.ca/highwire/filestream/87987/field_highwire_adjunct_files/0/2021-0254-1-at.pdf)
Supplement: 2021-0254-1-at.pdf [file 2021-0254-1-at.pdf]

## Supplementary figures

**eFigure S1:** Kaplan-Meier plot for overall survival by Charlson comorbidity index.

**eFigure S2:** Patient selection. OHIP – Ontario Health Insurance Plan database.

**eFigure S3:** Directed acyclic graph illustrating the potential links between the method of cancer detection (OBSP-screen-detected versus symptomatic) on overall survival.

## Supplementary tables

**eTable S1:** Administrative codes used to classify histological subtypes.

**eTable S2:** List of institutions and associated institution numbers of O-BAS at the time of analysis. The assessment centre start date is the date the institution became affiliated with the OBSP (e.g. met the criteria to be considered an O-BAS and a funding agreement was enacted with the Ontario Ministry of Health). OBSP – Ontario Breast Screening Program; O-BAS – OBSP-affiliated breast assessment site

**eTable S3:** Administrative codes to identify the date of surgery.

**eTable S4:** Administrative codes to identify the date of various diagnostic tests, consultations and visits, and imaging.

**eTable S5:** Healthcare encounters observed the suspicion date. If multiple encounters (e.g. diagnostic tests or consults) were observed on this date, the one chosen was based on a hierarchy.

**eTable S6:** Length of various subintervals measured between the date of suspicion and the date treatment started.

**eFigure S1: Kaplan-Meier plot for overall survival by Charlson comorbidity score**

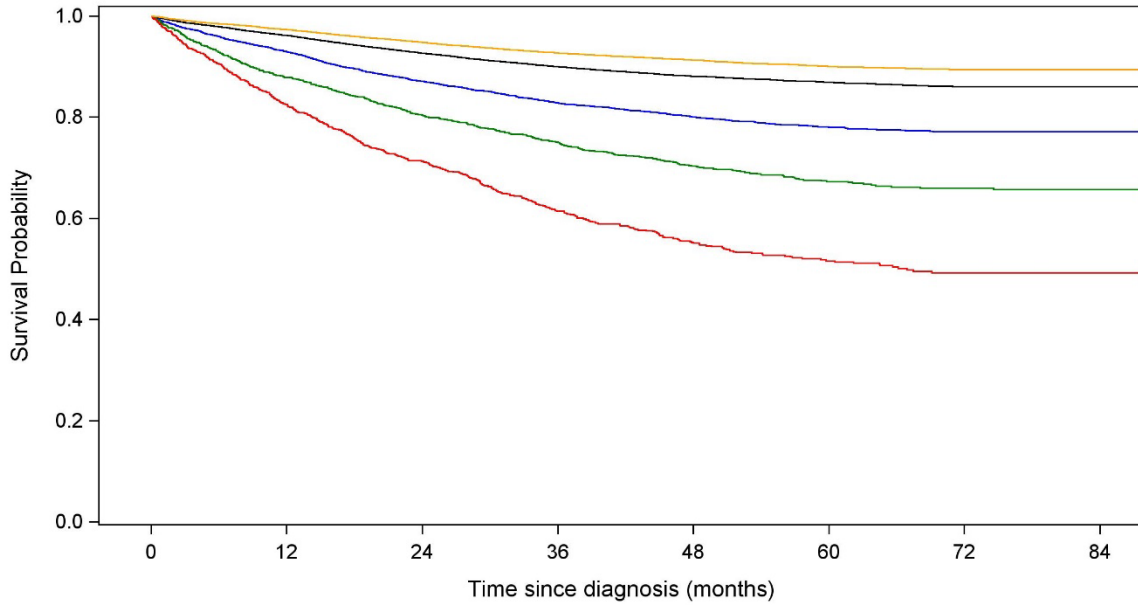

| Charlson Comorbidity Index | 0     | 1     | 2     | 3+    | missing |
|----------------------------|-------|-------|-------|-------|---------|
| 0                          | 25132 | 24046 | 22648 | 20035 | 16183   |
| 1                          | 4598  | 4252  | 3889  | 3397  | 2689    |
| 2                          | 1404  | 1227  | 1091  | 909   | 676     |
| 3+                         | 1073  | 881   | 739   | 568   | 406     |
| missing                    | 19218 | 18530 | 17621 | 15709 | 12865   |

Appendix 1, as supplied by the authors. Appendix to: Habbous S, Homenauth E, Barisic A, et al. Differences in breast cancer diagnosis by patient presentation in Ontario: a retrospective cohort study. *CMAJ Open* 2022. DOI:10.9778/cmajo.20210254. Copyright © 2022 The Author(s) or their employer(s). To receive this resource in an accessible format, please contact us at [cmajgroup@cmaj.ca](mailto:cmajgroup@cmaj.ca).

## eFigure S2: Patient selection

Number of unique patients with a breast cancer diagnosis between 2013 and 2017 (ICD-O-3 topography code C50; ICD-O-D behavior code = 3) (N=52,642)\*

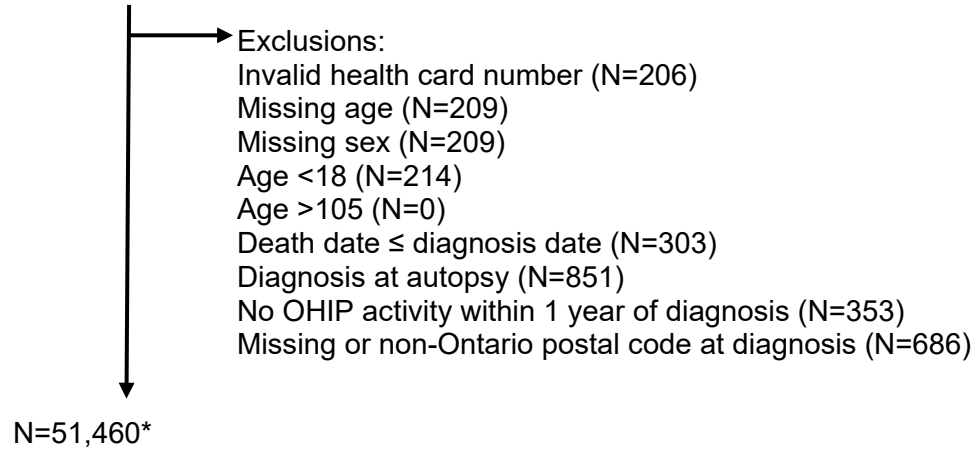

\*Cohort includes only unique patients.

1. For patients with bilateral breast cancer on the same day (i.e. same histology, same diagnosis date) and different laterality, we created a 'bilateral' flag for these patients and kept their record with the higher stage
2. If patient had multiple primaries during time period, we kept their earliest record.

**eFigure S3: Directed acyclic graph of symptomatic versus screened patients**

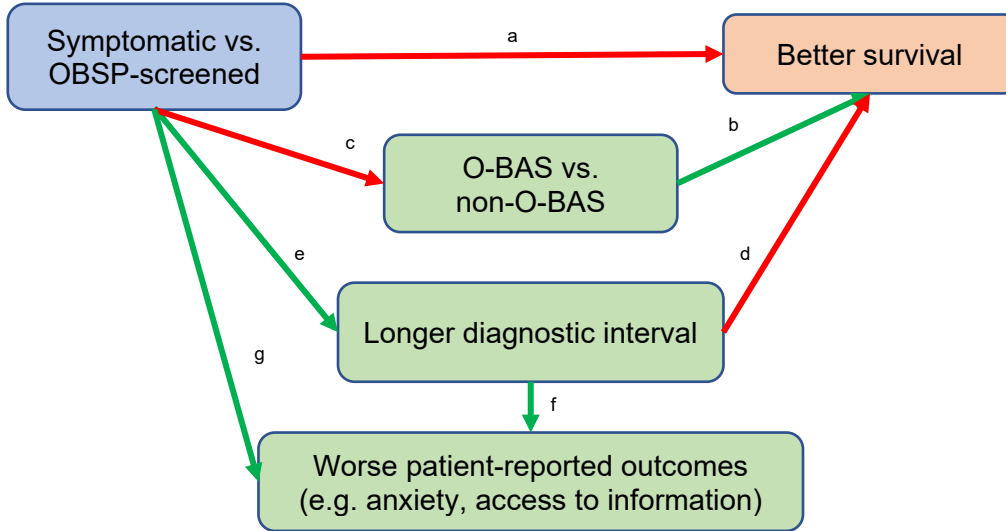

<sup>a</sup> symptomatic patients have features (e.g. demographic, clinical, and tumor characteristics) that negatively affect survival

<sup>b</sup> O-BAS is associated with better overall survival

<sup>c</sup> symptomatic patients are less likely to be referred to an O-BAS

<sup>d</sup> a longer diagnostic interval may result in worse survival for some patients

<sup>e</sup> symptomatic patients have a longer diagnostic interval

<sup>f</sup> a longer diagnostic interval may increase patient anxiety and other patient-reported outcomes

<sup>g</sup> symptomatic patients are more likely to have anxiety due to the presence of painful or noticeable breast symptoms, independent of wait-times

O-BAS - breast assessment site affiliated with the Ontario Breast Screening Program (OBSP)

**eTable S1: Histology categorization using the International Classification of Diseases for Oncology version 3.2 (ICD-O-3.2)**

| <b>Histological subgroup</b> | <b>ICD-O-3 histology code</b>                                                                                                                                                                                                                                                                                                                                  |
|------------------------------|----------------------------------------------------------------------------------------------------------------------------------------------------------------------------------------------------------------------------------------------------------------------------------------------------------------------------------------------------------------|
| Ductal                       | 8500 – Infiltrating duct carcinoma, NOS<br>8523 – Infiltrating duct mixed with other types of carcinoma<br>8507 – Intraductal micropapillary carcinoma<br>8541 – Paget disease and infiltrating duct carcinoma of breast                                                                                                                                       |
| Lobular                      | 8520 – Lobular carcinoma, NOS<br>8524 – Infiltrating lobular mixed with other types of carcinoma                                                                                                                                                                                                                                                               |
| Ductal and lobular           | 8522 – Infiltrating duct and lobular carcinoma                                                                                                                                                                                                                                                                                                                 |
| Mucinous                     | 8480 – Mucinous adenocarcinoma                                                                                                                                                                                                                                                                                                                                 |
| Adenocarcinoma               | 8140 – Adenocarcinoma, NOS<br>8211 – Tubular adenocarcinoma<br>8401 – Apocrine adenocarcinoma<br>8503 – Intraductal papillary adenocarcinoma with invasion<br>8260 – Papillary adenocarcinoma, NOS<br>8574 – Adenocarcinoma with neuroendocrine differentiation<br>8255 – Adenocarcinoma with mixed subtypes<br>8570 – Adenocarcinoma with squamous metaplasia |
| Other                        | All else                                                                                                                                                                                                                                                                                                                                                       |

## eTable S2: List of Ontario Breast Screening Program (OBSP)-affiliated Breast Assessment Sites (O-BAS)

Ontario facilities designated as an O-BAS that provide organized assessment must have certified mammography technologists and equipment that meets or exceeds that specified by Canadian Association of Radiologist's Mammography Accreditation Program (CAR-MAP); provide all abnormal mammographic work-up, including special mammographic views and image-guided core biopsy; provide radiological, surgical and pathologic consultation with experts in breast evaluation; and provide navigation for patient support and coordination of referrals.

To determine whether GP-screened and symptomatic patients were assessed at an O-BAS, we used the location of the patients' biopsy from billing data, supplemented with the location of the patients' surgery.<sup>12,15</sup> Using the OBSP-screened cohort for validation of this approach, we achieved a sensitivity of 95% and a specificity of 80% for the O-BAS designation.

| Clinic Name                                    | Assessment Centre Start Date | Institution Numbers |
|------------------------------------------------|------------------------------|---------------------|
| Ottawa Hospital - Civic Campus                 | October 29, 1998             | 4046; 4079          |
| Listowel Memorial Hospital                     | November 1, 1999             | 1740                |
| Timmins and District Hospital                  | January 1, 2000              | 3414; 4123          |
| Health Sciences North                          | October 15, 2000             | 4059; 4063          |
| Renfrew Victoria Hospital                      | March 1, 2001                | 1813; 4184          |
| Hotel Dieu Hospital                            | July 1, 2001                 | 4106; 4105          |
| St. Joseph's Hospital (London)                 | March 1, 2002                | 1497; 4255          |
| Pembroke Regional Hospital                     | March 15, 2002               | 1804; 4071          |
| Greater Niagara General Hospital               | April 1, 2002                | 3982; 4213          |
| St. Catharine's General Hospital               | April 1, 2002                | 4045; 4224          |
| Welland County General Hospital                | April 1, 2002                | 3978; 4227          |
| St. Michael's Hospital                         | August 1, 2002               | 1444; 3985          |
| Dixie X-Ray Associates - Finch                 | March 10, 2003               | N/A                 |
| Winchester District Memorial Hospital          | April 4, 2003                | 4267                |
| Grey Bruce Health Services - Owen Sound        | October 20, 2003             | 3944; 4131          |
| St. Joseph's Healthcare Hamilton - King Campus | November 20, 2003            | N/A                 |

Appendix 1, as supplied by the authors. Appendix to: Habbous S, Homenauth E, Barisic A, et al. Differences in breast cancer diagnosis by patient presentation in Ontario: a retrospective cohort study. *CMAJ Open* 2022.

DOI:10.9778/cmajo.20210254. Copyright © 2022 The Author(s) or their employer(s). To receive this resource in an accessible format, please contact us at [cmajgroup@cmaj.ca](mailto:cmajgroup@cmaj.ca).

|                                                              |                    |                        |
|--------------------------------------------------------------|--------------------|------------------------|
| Windsor Regional Hospital - Metropolitan Campus              | January 26, 2004   | 1079; 4414             |
| Stratford General Hospital                                   | October 5, 2004    | 1754; 4168             |
| Chatham Centre                                               | October 14, 2005   | 1223; 4238             |
| Thunder Bay Regional Health Sciences Centre                  | March 27, 2006     | 3853; 4315             |
| Vaughan Imaging Consultants                                  | April 1, 2006      | N/A                    |
| Princess Margaret Hospital                                   | May 1, 2006        | 4406; 3910             |
| Lakeridge Health - Oshawa                                    | September 25, 2006 | 4171                   |
| Lakeridge Health - Bowmanville                               | September 25, 2006 | N/A                    |
| Grand River Hospital - Freeport                              | July 30, 2007      | 3734; 4107             |
| Wentworth-Halton X-Ray and Ultrasound - Burlington South     | February 1, 2008   | 1160; 4144             |
| Woodstock General Hospital                                   | May 1, 2008        | 1716; 4057             |
| Hawkesbury and District General Hospital                     | July 1, 2008       | 1777; 4268             |
| Credit Valley Hospital                                       | January 19, 2009   | 4747; 4751             |
| Sault Area Hospital                                          | April 1, 2009      | 3972; 4407             |
| Juravinski Hospital & Cancer Care Centre**                   | August 10, 2010    | N/A                    |
| Trenton Memorial Hospital                                    | September 7, 2010  | 4099                   |
| WRH Breast Health - Ouellette Campus (formerly Hotel Dieu)** | January 4, 2011    | 4773; 4774; 4142       |
| Markham Stouffville Hospital                                 | January 17, 2011   | 3587; 4235             |
| Uxbridge Cottage Hospital                                    | January 17, 2011   | N/A                    |
| Bluewater Health - Norman                                    | June 1, 2011       | 4109; 4415             |
| Peterborough Regional Health Centre                          | June 24, 2011      | 1768; 4073             |
| Sensenbrenner Hospital                                       | July 1, 2011       | N/A                    |
| Kirkland and District Hospital                               | July 1, 2011       |                        |
| Hôpital Notre-Dame Hospital                                  | July 1, 2011       | N/A                    |
| Weeneebayko General Hospital                                 | July 1, 2011       |                        |
| Women's College Hospital                                     | July 4, 2011       | 4631                   |
| Sunnybrook Health Sciences Centre                            | July 4, 2011       | 3936; 4205             |
| Scarborough Health Network - General                         | August 15, 2011    | 3975; 4152             |
| Scarborough Health Network - Centenary                       | November 1, 2011   | 3943; 4139             |
| Southlake Regional Health Centre                             | November 1, 2011   | 2038; 4001             |
| Ross Memorial Hospital                                       | November 1, 2011   | 1893; 4177             |
| Etobicoke General Hospital                                   | November 7, 2011   | 3929; 4245             |
| Brampton Civic Hospital                                      | November 7, 2011   | 4016; 4681; 4685       |
| Mount Sinai Hospital                                         | November 14, 2011  | 1423; 4110; 4804; 4805 |
| Merivale Medical Imaging                                     | April 1, 2012      | N/A                    |
| Hôpital Montfort                                             | April 1, 2012      | 1661; 4130; 4461       |
| North York General - Branson                                 | April 1, 2012      | 4234                   |
| Royal Victoria Regional Health Centre                        | October 29, 2012   | 1825; 3987             |
| Brantford General Hospital                                   | November 14, 2012  | 4675; 4679             |
| St. Joseph's Healthcare Hamilton - Charlton Campus           | November 15, 2012  | 2003; 4054; 4055       |
| OBSP Hamilton*                                               | April 1, 2013      | 4014; 4140             |

Appendix 1, as supplied by the authors. Appendix to: Habbous S, Homenauth E, Barisic A, et al. Differences in breast cancer diagnosis by patient presentation in Ontario: a retrospective cohort study. *CMAJ Open* 2022.

DOI:10.9778/cmajo.20210254. Copyright © 2022 The Author(s) or their employer(s). To receive this resource in an accessible format, please contact us at [cmajgroup@cmaj.ca](mailto:cmajgroup@cmaj.ca).

|                                             |                  |            |
|---------------------------------------------|------------------|------------|
| Lakeridge Health - Ajax Pickering Hospital* | June 1, 2013     | 4104       |
| North Bay Regional Health Centre*           | April 1, 2014    | 4730; 4734 |
| South Bruce Grey Health Centre - Walkerton* | May 1, 2014      | 1330; 4233 |
| York Radiology Consultants***               | May 1, 2014      | 1983; 4285 |
| Georgetown Hospital*                        | July 1, 2014     | 3926; 4192 |
| Northumberland Hills Hospital*              | July 7, 2014     | 1681; 3970 |
| Juravinski Hospital                         | October 1, 2014  | 4039       |
| Mackenzie Health*                           | December 1, 2014 | 1515       |
| Oakville-Trafalgar Memorial Hospital*       | February 1, 2015 | 4759       |
| Queensway Carleton Hospital*                | April 1, 2015    | 2046       |
| North York General - General*               | April 15, 2015   | N/A        |
| Dixie X-Ray Associates - Highpoint*         | April 15, 2015   | N/A        |
| Queensway Health Centre*                    | April 18, 2015   | 4624       |
| Strathroy Middlesex General Hospital*       | January 4, 2016  | 3860; 4237 |
| Erie Shores HealthCare - Leamington*        | August 2, 2016   | 4231; 4298 |

The following institutions were identified as an O-BAS from algorithm, but corresponding assessment center is Unknown: 3984, 4048, 4085, 4180

\* Site became a paid assessment center during study period

\*\* Site closed during study period

\*\*\* Site became a paid assessment center during study period and was subsequently closed



**eTable S3: Healthcare encounters on the suspicion date**

| Index Contact Encounter Category                                 | N=47,840 | %   |
|------------------------------------------------------------------|----------|-----|
| OBSP abnormal breast screening                                   | 11,821   | 25% |
| Screening mammography                                            | 3,004    | 6%  |
| Breast cancer                                                    | 3,154    | 7%  |
| Other related cancers                                            | 371      | 1%  |
| Benign neoplasm/CIS                                              | 2,445    | 5%  |
| Breast cyst, cystic disease, abscess, hypertrophy, other         | 6,423    | 13% |
| Lymph system–related conditions                                  | 76       | 0%  |
| Diagnostic mammography and related procedures, with referral     | 11,534   | 24% |
| Diagnostic mammography and related procedures, no referral       | 742      | 2%  |
| Breast ultrasound, with referral                                 | 4,248    | 9%  |
| Breast ultrasound, no referral                                   | 190      | <1% |
| Other ultrasound, with referral                                  | 1,074    | 2%  |
| Other ultrasound, no referral                                    | 42       | <1% |
| Surgical consult with no procedure, with referral                | 1,518    | 3%  |
| Surgical consult with no procedure, no referral                  | 25       | <1% |
| Cyst aspiration or drainage, with referral                       | 62       | <1% |
| Cyst aspiration or drainage, no referral                         | 6        | <1% |
| Breast biopsy with or without ultrasound guidance, with referral | 576      | 1%  |
| Breast biopsy with or without ultrasound guidance, no referral   | 24       | <1% |
| Mastectomy, with referral                                        | <6       | <1% |
| Mastectomy, no referral                                          | <6       | <1% |
| Breast MRI, with referral                                        | 128      | <1% |
| Breast MRI, no referral                                          | <6       | <1% |
| Other MRI, with referral                                         | 194      | <1% |
| Other MRI, no referral                                           | 24       | <1% |
| Nuclear medicine, with referral                                  | 154      | <1% |
| Nuclear medicine, no referral                                    | <6       | <1% |

Healthcare encounters on the suspicion date. If more than one encounter was present on this date, a previously established hierarchy was used as per Groome et al (2019):

Groome PA, Webber C, Whitehead M, et al. Determining the Cancer Diagnostic Interval Using Administrative Health Care Data in a Breast Cancer Cohort. *JCO Clin cancer informatics*. 2019;3:1-10.

doi:10.1200/CCI.18.00131

OBSP – Ontario Breast Screening Program; CIS – Carcinoma *in situ*; MRI – magnetic resonance imaging

Appendix 1, as supplied by the authors. Appendix to: Habbous S, Homenauth E, Barisic A, et al. Differences in breast cancer diagnosis by patient presentation in Ontario: a retrospective cohort study. *CMAJ Open* 2022.

DOI:10.9778/cmajo.20210254. Copyright © 2022 The Author(s) or their employer(s). To receive this resource in an accessible format, please contact us at [cmajgroup@cmaj.ca](mailto:cmajgroup@cmaj.ca).

**eTable S4: Administrative codes for surgery**

| <b>Code</b>                                 | <b>Description</b>                                                                                                                                                                                                                      |
|---------------------------------------------|-----------------------------------------------------------------------------------------------------------------------------------------------------------------------------------------------------------------------------------------|
| <b>Surgery (OHIP definition)</b>            |                                                                                                                                                                                                                                         |
| R111                                        | Integumentary system surgical procedures – operations of the breast – partial mastectomy or wedge resection for treatment of breast disease, with or without biopsy, e.g. carcinoma or extensive fibrocystic disease                    |
| R108                                        | Integumentary system surgical procedures – operations of the breast – mastectomy – female (with or without biopsy), simple                                                                                                              |
| R109                                        | Mastectomy, radical or modified radical (with or without biopsy)                                                                                                                                                                        |
| R107                                        | Integumentary system surgical procedures – operations of the breast, excision, tumor or tissue for diagnostic biopsy and/or treatment, e.g. carcinoma, fibroadenoma or fibrocystic disease (single or multiple – same breast)           |
| R117                                        | Integumentary system surgical procedures – operations of the breast – mastectomy, radical or modified radical (with or without biopsy)                                                                                                  |
| R148                                        | Integumentary system surgical procedures – operations of the breast – mastectomy – male – unilateral for treatment of pathological male breast disease (with or without biopsy), e.g. carcinoma – simple                                |
| R149                                        | Integumentary system surgical procedures – operations of the breast – mastectomy – male – unilateral for treatment of pathological male breast disease (with or without biopsy), e.g. carcinoma – subcutaneous with nipple preservation |
| <b>Surgery (CIHI definition)</b>            |                                                                                                                                                                                                                                         |
| 1YM87                                       | Excision partial, breast                                                                                                                                                                                                                |
| 1YM89                                       | Excision total, breast                                                                                                                                                                                                                  |
| 1YM91                                       | Excision(modified) radical, breast                                                                                                                                                                                                      |
| 1YM90                                       | Excision total with reconstruction, breast                                                                                                                                                                                              |
| 1YM88                                       | Excision partial with reconstruction, breast                                                                                                                                                                                            |
| 1YM92                                       | Excision radical with reconstruction, breast                                                                                                                                                                                            |
| 1YK87                                       | Excision partial, nipple                                                                                                                                                                                                                |
| 1YK90                                       | Excision total with reconstruction, nipple                                                                                                                                                                                              |
| 1YK89                                       | Excision total, nipple                                                                                                                                                                                                                  |
| 1YL89                                       | Excision total, lactiferous duct                                                                                                                                                                                                        |
| 1YL87                                       | Excision partial, lactiferous duct                                                                                                                                                                                                      |
| <b>Surgery (QBP definition, using CIHI)</b> |                                                                                                                                                                                                                                         |
| 1YM87                                       | Excision partial, breast                                                                                                                                                                                                                |

|            |                                                                                                                           |
|------------|---------------------------------------------------------------------------------------------------------------------------|
| 1YM91LAXXQ | Excision radical, breast using combined sources of tissue [e.g. local flap and tissue expander] modified or NOS           |
| 1YM87DA    | Excision partial, breast using endoscopic approach with simple apposition                                                 |
| 1YM87GB    | Excision partial, breast using endoscopic guide wire (or needle hook) excision technique with simple apposition of tissue |
| 1YM87LA    | Excision partial, breast using open approach with simple apposition of tissue (e.g. suturing)                             |
| 1YM87LAXXA | Excision partial, breast using open approach and full thickness autograft to close defect                                 |
| 1YM87LAXXE | Excision partial, breast using open approach and local flap (to close defect)                                             |
| 1YM87UT    | Excision partial, breast using open guide wire (or needle hook) excision technique and simple apposition of tissue        |
| 1YM89LA    | Excision total, breast without tissue repair                                                                              |
| 1YM89LAXXA | Excision total, breast with full thickness autograft                                                                      |
| 1YM89LAXXE | Excision total, breast using open approach and local flap                                                                 |
| 1YM91LA    | Excision (modified) radical, breast without tissue                                                                        |
| 1YM91LAPM  | Excision radical, breast with implantation of breast prosthesis modified or NOS                                           |
| 1YM91LATP  | Excision (modified) radical, breast with implantation of tissue expander                                                  |
| 1YM91LAXXA | Excision radical (modified), breast using full thickness autograft                                                        |
| 1YM91LAXXE | Excision (modified) radical, breast using local flap                                                                      |
| 1YM91TR    | Excision extended radical, breast without tissue                                                                          |
| 1YM91TRXXA | Excision extended radical, breast using full thickness autograft                                                          |
| 1YM91TRXXE | Excision extended radical, breast using local flap                                                                        |
| 1YM91WP    | Excision super radical, breast without tissue                                                                             |
| 1YM91WPXXA | Excision radical, breast using autograft super [Wangensteen                                                               |
| 1YM91WPXXE | Excision super radical, breast using local flap                                                                           |
| 1YM88LAPM  | Excision partial with reconstruction, breast without tissue with implantation of prosthesis                               |
| 1YM88LAPME | Excision partial with reconstruction, breast with local flap with implantation of prosthesis                              |
| 1YM88LAPMF | Excision partial with reconstruction, breast using free flap with implantation of prosthesis                              |
| 1YM88LAPMG | Excision partial with reconstruction, breast using distant pedicled flap with implantation of prosthesis                  |
| 1YM88LAPMK | Excision partial with reconstruction, breast using homograft with implantation of prosthesis                              |
| 1YM88LAQF  | Excision partial with reconstruction, breast without tissue with implantation of prosthesis and expander                  |
| 1YM88LAQFE | Excision partial with reconstruction, breast with local flap with implantation of prosthesis and expander                 |
| 1YM88LAQFF | Excision partial with reconstruction, breast using free flap with implantation of prosthesis and expander                 |
| 1YM88LAQFG | Excision partial with reconstruction, breast using distant pedicled flap with implantation of prosthesis and ex           |
| 1YM88LATP  | Excision partial with reconstruction, breast without tissue with implantation of tissue expander                          |
| 1YM88LATPE | Excision partial with reconstruction, breast with local flap with tissue expander                                         |
| 1YM88LATPF | Excision partial with reconstruction, breast using free flap with implantation of tissue expander                         |
| 1YM88LATPG | Exc prt breast w tiss expand ped flap reconstr                                                                            |
| 1YM88LATPK | Excision partial with reconstruction, breast using homograft with implantation of tissue expander                         |
| 1YM88LAXXE | Excision partial with reconstruction, breast using local flap with no implanted device                                    |

|            |                                                                                                                                        |
|------------|----------------------------------------------------------------------------------------------------------------------------------------|
| 1YM88LAXXF | Excision partial with reconstruction, breast using free flap with no implanted device                                                  |
| 1YM88LAXXG | Excision partial with reconstruction, breast using distant pedicled flap with no implanted device                                      |
| 1YM90LAPM  | Excision total with reconstruction, breast simple mastectomy with no node dissection without tissue with implantation of breast prosth |
| 1YM90LAPME | Excision total with reconstruction, breast simple mastectomy with no node dissection using local flap with implantation of breast pros |
| 1YM90LAPMF | Excision total with reconstruction, breast simple mastectomy with no node dissection using free flap (2) with implantation of breast p |
| 1YM90LAPMG | Excision total with reconstruction, breast simple mastectomy with no node dissection using distant pedicled flap(1) with implantation  |
| 1YM90LAPMK | Excision total with reconstruction, breast using homograft with implantation of breast prosthesis                                      |
| 1YM90LAQF  | Excision total with reconstruction, breast simple mastectomy with no node dissection without tissue with implantation of prosthesis an |
| 1YM90LAQFE | Excision total with reconstruction, breast simple mastectomy with no node dissection using local flap with implantation of prosthesis  |
| 1YM90LAQFF | Excision total with reconstruction, breast simple mastectomy with no node dissection using free flap (2) with implantation of prosthes |
| 1YM90LAQFG | Excision total with reconstruction, breast simple mastectomy with no node dissection using distant pedicled flap(1) with implantation  |
| 1YM90LATP  | Excision total with reconstruction, breast simple mastectomy with no node dissection without tissue with implantation of tissue expand |
| 1YM90LATPE | Excision total with reconstruction, breast using local flap with implantation of tissue expander                                       |
| 1YM90LATPF | Excision total with reconstruction, breast simple mastectomy with no node dissection using free flap (2) with implantation of tissue e |
| 1YM90LATPG | Excision total with reconstruction, breast simple mastectomy with no node dissection using distant pedicled flap(1) with implantation  |
| 1YM90LATPK | Excision total with reconstruction, breast using homograft with implantation of tissue expander                                        |
| 1YM90LAXXE | Excision total with reconstruction, breast simple mastectomy with no node dissection using local flap with no implanted device         |
| 1YM90LAXXF | Excision total with reconstruction, breast simple mastectomy with no node dissection using free flap (2) with no implanted device      |
| 1YM90LAXXG | Excision total with reconstruction, breast simple mastectomy with no node dissection using distant pedicled flap(1) with no implanted  |
| 1YM90LAXXQ | Excision total with reconstruction, breast with no implanted device using combined sources of tissue (e.g. free                        |
| 1YM92LAPME | Excision (modified) radical with reconstruction, breast using local flap with implantation of breast prosthesis                        |
| 1YM92LAPMF | Excision (modified) radical with reconstruction, breast using free flap with implantation of breast prosthesis                         |
| 1YM92LAPMG | Excision (modified) radical with reconstruction, breast using distant pedicled flap with implantation of breast prosthesis             |

|            |                                                                                                                                  |
|------------|----------------------------------------------------------------------------------------------------------------------------------|
| 1YM92LAQFE | Excision (modified) radical with reconstruction, breast using local flap with implantation of prosthesis and expander            |
| 1YM92LAQFG | Excision (modified) radical with reconstruction, breast using distant pedicled flap with implantation of prosthesis and expander |
| 1YM92LATPE | Excision (modified) radical with reconstruction, breast using local flap with implantation of tissue expander                    |
| 1YM92LATPF | Excision (modified) radical with reconstruction, breast using free flap with implantation of tissue expander                     |
| 1YM92LATPG | Excision (modified) radical with reconstruction, breast using distant pedicled flap with implantation of tissue expander         |
| 1YM92LATPK | Excision radical with reconstruction, breast modified or NOS using homograft with implantation of tissue expander                |
| 1YM92LAXXE | Excision (modified) radical with reconstruction, breast using local flap with no implanted device                                |
| 1YM92LAXXF | Excision (modified) radical with reconstruction, breast using free flap with no implanted device                                 |
| 1YM92LAXXG | Excision (modified) radical with reconstruction, breast using distant pedicled flap with no implanted device                     |
| 1YM92LAXXQ | Excision radical with reconstruction, breast modified or NOS with no implanted device using combined sources of                  |
| 1YM92TRPME | Excision radical with reconstruction, breast extended [Urban] using local flap with implantation of breast prosthesis            |
| 1YM92TRPMK | Excision radical with reconstruction, breast extended [Urban] using homograft with implantation of breast prosthesis             |
| 1YM92TRTPE | Excision radical with reconstruction, breast extended [Urban] using local flap with implantation of tissue expander              |
| 1YM92TRTPK | Excision radical with reconstruction, breast extended [Urban] using homograft with implantation of tissue expander               |
| 1YM92TRXXE | Excision extended radical with reconstruction, breast using local flap with no implanted device                                  |
| 1YM92TRXXF | Excision extended radical with reconstruction, breast using free flap with no implanted device                                   |
| 1YM92TRXXQ | Exc rad w reconstr breast OA w ext rad excisn combo tis                                                                          |
| 1YM92WPPMK | Excision radical with reconstruction, breast super [Wangensteen] using homograft with implantation of breast prosthesis          |
| 1YM92WPTPK | Excision radical with reconstruction, breast super [Wangensteen] using homograft with implantation of tissue expander            |
| 1YM92LAPMK | Excision radical with reconstruction, breast modified or NOS using homograft with implantation of breast prosthesis              |
| 1YM92TRPMF | Excision radical with reconstruction, breast extended [Urban] using free flap with implantation of breast prosthesis             |
| 1YM92TRPMG | Excision radical with reconstruction, breast extended [Urban] using distant pedicled flap with implantation of breast prosthesis |
| 1YM92TRTPF | Excision radical with reconstruction, breast extended [Urban] using free flap with implantation of tissue expander               |

|            |                                                                                                                                                              |
|------------|--------------------------------------------------------------------------------------------------------------------------------------------------------------|
| 1YM92TRTPG | Excision radical with reconstruction, breast extended [Urban] using distant pedicled flap with implantation of tissue expander                               |
| 1YM92TRXXG | Excision radical with reconstruction, breast extended [Urban] using distant pedicled flap with no implanted device                                           |
| 1YM92WPPME | Excision radical with reconstruction, breast super [Wangensteen] using local flap with implantation of breast prosthesis                                     |
| 1YM92WPPMF | Excision radical with reconstruction, breast super [Wangensteen] using free flap with implantation of breast prosthesis                                      |
| 1YM92WPPMG | Excision radical with reconstruction, breast super [Wangensteen] using distant pedicled flap with implantation of breast prosthesis                          |
| 1YM92WPTPE | Excision radical with reconstruction, breast super [Wangensteen] using local flap with implantation of tissue expander                                       |
| 1YM92WPTPF | Excision radical with reconstruction, breast super [Wangensteen] using free flap with implantation of tissue expander                                        |
| 1YM92WPTPG | Excision radical with reconstruction, breast super [Wangensteen] using distant pedicled flap with implantation of tissue expander                            |
| 1YM87UTXXA | Excision partial, breast using open guide wire (or needle hook) excision technique with autograft (to close defect)                                          |
| 1YM87UTXXE | Excision partial, breast using open guide wire (or needle hook) excision technique with local flap (to close defect)                                         |
| 1YM92WPXXF | Excision radical with reconstruction, breast super [Wangensteen] using free flap with no implanted device                                                    |
| 1YM92WPXXG | Excision radical with reconstruction, breast super [Wangensteen] using distant pedicled flap with no implanted device                                        |
| 1YM92WPXXQ | Excision radical with reconstruction, breast super [Wagensteen] using combined sources of tissue (e.g. free and pedicled TRAM flap) with no implanted device |
| 1YK87LA    | Excision partial, nipple using open excisional approach                                                                                                      |
| 1YK87LAXXA | Excision partial, nipple using open excisional approach and full thickness autograft                                                                         |
| 1YK87LAXXB | Excision partial, nipple using open excisional approach and split thickness autograft                                                                        |
| 1YK87LAXXE | Excision partial, nipple using open excisional approach and local flap [e.g. rotation, advancement, transposition, Z-plasty] for closure                     |
| 1YK89LA    | Excision total, nipple using open approach                                                                                                                   |
| 1YK89LAXXA | Excision total, nipple using open approach and full thickness autograft                                                                                      |
| 1YK89LAXXE | Excision total, nipple using open approach and local flap [e.g. rotation, advancement, transposition, Z-plasty]                                              |
| 1YK90LAXXA | Excision total with reconstruction, nipple using open approach and full thickness autograft [e.g. contralateral nipple, labia, thigh, retroauricular tissue] |
| 1YK90LAXXE | Excision total with reconstruction, nipple using open approach and local skin flap [e.g. propeller, star, quadripod skate]                                   |
| 1YK90LAXXQ | Excision total with reconstruction, nipple using open approach and combined local flap [e.g. nipple] and autograft [e.g. areola]                             |

|                                                                                                                                                                                                                                                                                                                                                                                                                                                                                                                                                       |                                                        |
|-------------------------------------------------------------------------------------------------------------------------------------------------------------------------------------------------------------------------------------------------------------------------------------------------------------------------------------------------------------------------------------------------------------------------------------------------------------------------------------------------------------------------------------------------------|--------------------------------------------------------|
| 1YL87LA                                                                                                                                                                                                                                                                                                                                                                                                                                                                                                                                               | Excision partial, lactiferous duct using open approach |
| 1YL89LA                                                                                                                                                                                                                                                                                                                                                                                                                                                                                                                                               | Excision total, lactiferous duct using open approach   |
| <p>Restricted to the following ICD-10 diagnostic codes: C00-C97, D050, D051, D057, D059, D24, D486, D0500, D0501, D0509, D0510, D0511, D0519, D0570, D0571, D0579, D0590, D0591, D0599, D038, D039, D048, D049, D097, D099, D197, D199, D367, D369, D487, D489.</p> <p>OHIP – Ontario Health Insurance Plan database; CIHI – Canadian Institute of Health Information, which includes data from hospital-based procedures (inpatient and outpatient); QBP – quality-based procedures (a definition of surgery established at Cancer Care Ontario)</p> |                                                        |

**eTable S5: Administrative codes for healthcare utilization**

| <b>Code</b>                 | <b>Source</b> | <b>Description</b>                                                                                                  |
|-----------------------------|---------------|---------------------------------------------------------------------------------------------------------------------|
| <b>Diagnostic mammogram</b> |               |                                                                                                                     |
| X184                        | OHIP          | Unilateral Mammogram - for individuals with signs or symptoms or follow-up of established disease                   |
| X185                        | OHIP          | Bilateral Mammogram - for individuals with signs or symptoms or follow-up of established disease                    |
| X194                        | OHIP          | Additional coned views with or without magnification (limit of two per breast) per film                             |
| <b>Screening mammogram</b>  |               |                                                                                                                     |
| X172                        | OHIP          | Unilateral Mammogram - for individuals with identified risk factors in accordance with clinical practice guidelines |
| X178                        | OHIP          | Bilateral Mammogram - for individuals with identified risk factors in accordance with clinical practice guidelines  |
| <b>Breast biopsy</b>        |               |                                                                                                                     |
| J149                        | OHIP          | Ultrasonic guidance of biopsy, aspiration, amniocentesis or drainage procedures (one physician only)                |
| X121                        | OHIP          | Stereotactic core breast biopsy                                                                                     |
| Z141                        | OHIP          | Needle Biopsy - one or more                                                                                         |
| Z143                        | OHIP          | Needle Biopsy - large core breast biopsy - (14 gauge or larger bore needle)                                         |
| 2YK71                       | CIHI          | Biopsy, nipple using percutaneous approach (needle, punch) or open [incisional] approach                            |
| 2YM71                       | CIHI          | Biopsy, breast using percutaneous (needle) aspiration, device NEC or ore needle aspiration technique                |
| 2SZ71                       | CIHI          | Biopsy, soft tissue of the chest and abdomen using percutaneous (needle) approach or open [incisional] approach     |
| <b>Lymph node biopsy</b>    |               |                                                                                                                     |
| R914                        | OHIP          | Axillary or inguinal lymph nodes - limited resection, unilateral                                                    |
| Z405                        | OHIP          | Biopsy, Anterior cervical lymph node(s), unilateral                                                                 |
| Z406                        | OHIP          | Biopsy, Scalene, posterior cervical lymph node(s), unilateral                                                       |
| Z407                        | OHIP          | Percutaneous retroperitoneal, one group                                                                             |
| Z408                        | OHIP          | Bone marrow core biopsy (with biopsy needle)                                                                        |
| Z409                        | OHIP          | Percutaneous retroperitoneal, two group                                                                             |
| Z411                        | OHIP          | Biopsy, Axillary or inguinal lymph node(s), unilateral                                                              |
| <b>Sentinel node biopsy</b> |               |                                                                                                                     |
| Z427                        | OHIP          | Sentinel node biopsy, per draining basin                                                                            |
| 2MD71                       | CIHI          | Biopsy, lymph node(s), axillary using percutaneous (needle) approach or open approach                               |



## Consultations and visits

|                                             |      |                                                                                                                                                                                                            |
|---------------------------------------------|------|------------------------------------------------------------------------------------------------------------------------------------------------------------------------------------------------------------|
| Internal medicine consult                   | OHIP | A135, A130, A435, A136, A133, A134, A138, C135, C130, C435, C136, C133, C134, C131, W235, W130, W435, W236                                                                                                 |
| Dermatology consult                         | OHIP | A025, A027, A026, A023, A024, A020, C025, C026, C023, C024, C020, W025, W026                                                                                                                               |
| Cardiology consult                          | OHIP | A605, A600, A675, A606, A603, A604, A601, A608, A605, A600, A675, A606, A603, A604, A601, A608, C605, C600, C675, C606, C603, C604, C601<br>HSP specialty code = 60                                        |
| General practitioner visit                  | OHIP | A005, A911, A912, A945, A905, A006, A003, A004, A888, A091, A900, A933, A100, A937, A967                                                                                                                   |
| Cardiac surgery consult                     | OHIP | A095, A935, A096, A093, A094, C095, C935, C096, C093, C094, W095, W096<br>HSP specialty code = 09                                                                                                          |
| Medical oncology consult                    | OHIP | A445, A845, A446, A443, A444, A441, A448, C445, C845, C446, C443, C444, C441, W445, W765, W845, W44                                                                                                        |
| Radiation oncology consult                  | OHIP | A345, A765, A745, A346, A343, A340, A341, A348, C345, C765, C745, C346, C343, C344, C341                                                                                                                   |
| General or general thoracic surgery consult | OHIP | A645, A935, A646, A643, A644, C645, C935, C646, C643, C644, A035, A036, A033, A034, C035, C935, C036, C033, C034, W035, W036<br>HSP specialty code = 03 (general surgery) or 64 (general thoracic surgery) |
| Diagnostic radiology assessment             | OHIP | A335, A365, A330, A332, A331, A338, C335, C365, C330, C332                                                                                                                                                 |

## Breast ultrasound

|       |      |                                                  |
|-------|------|--------------------------------------------------|
| J127  | OHIP | Diagnostic Ultrasound - scan B-mode (per breast) |
| 3YM30 | OHIP | Ultrasound, breast                               |

## Abdominal/thoracic ultrasound

|       |      |                                                                                       |
|-------|------|---------------------------------------------------------------------------------------|
| J128  | OHIP | Abdominal scan - limited study (e.g. gallbladder only, aorta only or follow-up study) |
| J135  | OHIP | Abdominal scan - complete                                                             |
| 3OT30 | CIHI | Ultrasound, abdominal cavity                                                          |
| 3GY30 | CIHI | Ultrasound, thoracic cavity                                                           |

## Abdominal/thoracic computed tomography (CT) scan

|       |      |                                                |
|-------|------|------------------------------------------------|
| X406  | OHIP | Thorax -without IV contrast                    |
| X407  | OHIP | Thorax -with IV contrast                       |
| X125  | OHIP | Thorax -with and without IV contrast           |
| X409  | OHIP | Abdomen -without IV contrast                   |
| X410  | OHIP | Abdomen -without IV contrast                   |
| X126  | OHIP | Abdomen -without IV contrast                   |
| 3OT20 | CIHI | Computerized tomography [CT], abdominal cavity |

|       |      |                                               |
|-------|------|-----------------------------------------------|
| 3YM20 | CIHI | Computerized tomography [CT], breast          |
| 3GY20 | CIHI | Computerized tomography [CT], thoracic cavity |

### Abdominal/thoracic magnetic resonance imaging (MRI) scan

|       |      |                                                                                                                             |
|-------|------|-----------------------------------------------------------------------------------------------------------------------------|
| X446  | OHIP | Breast - unilateral or bilateral, multislice sequence                                                                       |
| X447  | OHIP | Breast - unilateral or bilateral, repeat (another plane, different pulse sequence - to a maximum of 3 repeats).             |
| X441  | OHIP | Thorax - multislice sequence                                                                                                |
| X445  | OHIP | Thorax - repeat (another plane, different pulse sequence - to a maximum of 3 repeats).                                      |
| X451  | OHIP | Abdomen - multislice sequence                                                                                               |
| X455  | OHIP | Abdomen - repeat (another plane, different pulse sequence - to a maximum of 3 repeats).                                     |
| X499  | OHIP | Three Dimensional MRI acquisition sequence, including post-processing (minimum of 60 slices; maximum 1 per patient per day) |
| 3OT40 | CIHI | Magnetic resonance imaging [MRI], abdominal cavity                                                                          |
| 3YM40 | CIHI | Magnetic resonance imaging [MRI], breast                                                                                    |
| 3GY40 | CIHI | Magnetic resonance imaging [MRI], thoracic cavity                                                                           |

### Chest x-ray

|       |      |                             |
|-------|------|-----------------------------|
| X090  | OHIP | Chest - single view         |
| X091  | OHIP | Chest - two views           |
| X092  | OHIP | Chest - three or more views |
| 3GY10 | CIHI | Xray, thoracic cavity       |

### Other (ductogram, capsulotomy, capsulectomy)

|       |      |                                                                   |
|-------|------|-------------------------------------------------------------------|
| X192  | OHIP | Mammary ductography                                               |
| J037  | OHIP | Mammary ductography                                               |
| 3YL10 | CIHI | Xray, lactiferous duct                                            |
| Z182  | OHIP | Breast capsulectomy                                               |
| Z135  | OHIP | Open capsulotomy with or without replacement of breast prosthesis |
| 1YM72 | CIHI | Release, breast                                                   |

---

OHIP – Ontario Health Insurance Plan database; CIHI – Canadian Institute of Health Information, which includes data from hospital-based procedures (inpatient and outpatient)

**eTable S6: Subintervals**

| Time interval                              | Description                                                                                                                                      | Statistic            | Non-O-BAS<br>(n=8,862) | O-BAS<br>(n=42,598) | Total<br>(n=51,460) |
|--------------------------------------------|--------------------------------------------------------------------------------------------------------------------------------------------------|----------------------|------------------------|---------------------|---------------------|
| Pre-treatment interval                     | Time from diagnosis to first treatment                                                                                                           | N (%)                | 7,386 (83%)            | 39,614 (93%)        | 50,232 (98%)        |
|                                            |                                                                                                                                                  | Median (IQR), days   | 34 (21, 49)            | 34 (23, 47)         | 34 (23, 47)         |
|                                            |                                                                                                                                                  | 90% percentile, days | 72                     | 63                  | 63                  |
| Total interval                             | Time from index contact to initial treatment<br>(diagnosis or first treatment)                                                                   | N (%)                | 7,788 (88%)            | 40,052 (94%)        | 47,840 (93%)        |
|                                            |                                                                                                                                                  | Median (IQR), days   | 39 (20, 92)            | 35 (18, 79)         | 35 (19, 82)         |
|                                            |                                                                                                                                                  | 90% percentile, days | 174                    | 162                 | 165                 |
| Breast imaging interval                    | Time from referring physician visit to first breast<br>imaging (diagnostic mammogram, breast<br>ultrasound or breast magnetic resonance imaging) | N (%)                | 6,982 (79%)            | 38,991 (92%)        | 45,973 (89%)        |
|                                            |                                                                                                                                                  | Median (IQR), days   | 7 (3, 14)              | 7 (3, 14)           | 7 (3, 14)           |
|                                            |                                                                                                                                                  | 90% percentile, days | 31                     | 29                  | 29                  |
| Surgical consult interval                  | Time from referring physician visit to first surgical<br>consult (biopsy, cyst aspiration, mastectomy)                                           | N (%)                | 6,670 (75%)            | 37,453 (88%)        | 44,123 (86%)        |
|                                            |                                                                                                                                                  | Median (IQR), days   | 6 (3, 12)              | 6 (3, 10)           | 6 (3, 10)           |
|                                            |                                                                                                                                                  | 90% percentile, days | 21                     | 18                  | 19                  |
| Biopsy interval                            | Time from referring physician/biopsying physician<br>to first biopsy between index contact and<br>diagnosis date                                 | N (%)                | 6,492 (73%)            | 37,948 (89%)        | 44,440 (86%)        |
|                                            |                                                                                                                                                  | Median (IQR), days   | 2 (2, 5)               | 2 (2, 4)            | 2 (2, 4)            |
|                                            |                                                                                                                                                  | 90% percentile, days | 7                      | 6                   | 6                   |
| First assessment interval                  | Time from index contact to first diagnostic<br>test/consult                                                                                      | N (%)                | 7,250 (82%)            | 38,934 (91%)        | 46,184 (90%)        |
|                                            |                                                                                                                                                  | Median (IQR), days   | 11 (4, 31)             | 13 (6, 29)          | 13 (5, 29)          |
|                                            |                                                                                                                                                  | 90% percentile, days | 89                     | 80                  | 82                  |
| First Assessment to<br>Diagnostic Interval | Time from first diagnostic test to diagnosis date                                                                                                | N (%)                | 7,250 (82%)            | 38,934 (91%)        | 46,184 (90%)        |
|                                            |                                                                                                                                                  | Median (IQR), days   | 20 (10, 42)            | 17 (8, 36)          | 17 (8, 36)          |
|                                            |                                                                                                                                                  | 90% percentile, days | 113                    | 100                 | 102                 |
| Diagnostic interval                        | Time from index contact to diagnosis date                                                                                                        | N (%)                | 7,788 (88%)            | 40,052 (94%)        | 47,840 (93%)        |
|                                            |                                                                                                                                                  | Median (IQR), days   | 39 (20, 92)            | 35 (18, 79)         | 35 (19, 82)         |
|                                            |                                                                                                                                                  | 90% percentile, days | 174                    | 162                 | 165                 |

O-BAS – OBSP-affiliated breast assessment site; OBSP – Ontario Breast Screening Program; IQR – (25<sup>th</sup>, 75<sup>th</sup> percentile)
